# Supplementary material for: Taxonomic revision of Dasydorylas Skevington, 2001 (Diptera, Pipunculidae) in the Middle East
Source: PeerJ journal article supplement (doi:10.7717/peerj.8511), 2020-02-18
Supplement: Dasydorylas_sequences.docx [file Dasydorylas_sequences.docx]

>*D. horridus*_52204_GB:MN520766

CAACAAATCATAAAGATATTGGAACTTTATATTTTATATTCGGTGCATGAGCCGGAATAGTAGGAACATCCTTAAGTATTTTAATTCGAGCTGAACTAGGACACCCCGGCTCACTAATTGGAGATGACCAGATTTATAATGTTATTGTAACAGCTCACGCTTTTGTAATAATTTTCTTTATAGTTATACCTATTATAATTGGTGGATTTGGAAATTGACTTGTACCCCTAATGCTAGGAGCTCCAGATATAGCTTTTCCACGAATAAATAACATAAGTTTCTGGATATTACCTCCATCTTTAACATTACTTTTAGTAAGAAGTATAGTCGATAATGGAGCTGGAACAGGTTGAACTGTATACCCCCCTCTATCTTCAAATATTGCCCACGGAGGGGCTTCAGTAGATTTAGCAATTTTTTCTTTACATCTTGCTGGAATCTCCTCAATTCTAGGAGCTGTAAATTTCATCACAACAGTGATTAATATACGGTCAACAGGAATTACATTTGATCGCATACCCTTATTTGTATGAGCAGTAGTAATTACAGCCTTATTATTACTTTTATCATTACCTGTACTAGCTGGAGCTATTACTATATTATTAACTGACCGAAATTTTAATACATCCTTCTTTGACCCCGCTGGAGGAGGAGATCCTATTTTATACC

>*D. dactylos*_50777_GB: MN50769

CAACAAATCATAAAGATATTGGTACATTATATTTCATATTTGGGGCATGAGCAGGAATAGTAGGAACATCCTTAAGAATTTTAATTCGTGCTGAATTAGGTCATCCAGGTTCATTAATTGGAGATGATCAAATCTATAATGTAATTGTTACAGCTCATGCTTTTATCATAATTTTTTTTATAGTAATACCTATTATAATTGGAGGATTTGGTAACTGACTAGTACCCCTAATACTAGGAGCGCCAGACAT-------------------------------------------------------------------------------------------------------------------------------------------------------------------------------------------ATTTCTTCTATTTTAGGAGCTGTAAATTTTATCACTACAGTAATTAATATACGATCTTCAGGTATTACATTCGATCGAATACCTTTATTTGTATGAGCCGTAGTAATTACCGCCTTATTATTACTTCTATCACTACCAGTATTAGCAGGTGCTATTACTATACTATTAACTGATCGAAATTTTAATACTTCATTCTTTGATCCTGCTGGTGGAGGAGATCCAATTTTATATC

>*D. discoidalis* _52200_MN520767

---CAAATCATAAAGATATTGGTACACTAAATTTTATATTTGGTGCATGAGCAGGAATAGTAGGAACATCCTTAAGAATTTTAATTCGTGCTGAATTAGGCCATCCAGGTTCATTAATTGGAGATGATCAAATCTATAATGTAATTGTTACAGCTCATGCTTTTATTATAATTTTTTTTATAGTAATACCTATTATAATTGGAGGATTTGGTAACTGACTAGTACCCCTAATATTAGGAGCACCAGATATAGCATTCCCCCGAATAAATAATATAAGATTCTGATTATTACCACCATCTTTAACCTTACTATTAATGAGTAGTATAGTAGATAATGGAGCTGGAACAGGATGAACTGTATACCCCCCACTATCATCTAATATTGCACATGGAGGAGCATCAGTAGATTTAGCTATCTTTTCACTTCACCTTGCTGGAATCTCATCAATTCTAGGAGCTGTAAATTTTATTACTACAGTAATTAATATACGATCCTCAGGTATCACTTTTGATCGAATACCCCTATTTGTATGGGCTGTAGTAATTACTGCATTATTATTACTTCTGTCACTACCAGTATTAGCAGGCGCTATTACTATACTATTAACAGATCGAAATTTTAATACTTCATTCTTTGACCCTGCTGGTGGAGGAGACCCAATCCTATACC

>*D. discoidalis* _470632_ GB:MN520770

CAACAAATCATAAAGATATTGGTACACTATATTTTATATTTGGTGCATGAGCAGGAATAGTAGGAACATCCTTAAGAATTTTAATTCGTGCTGAATTAGGCCATCCAGGTTCATTAATTGGAGATGATCAAATCTATAATGTAATTGTTACAGCTCATGCTTTTATTATAATTTTTTTTATAGTAATACCTATTATAATTGGAGGATTTGGTAACTGACTAGTACCCCTAATATTAGGAGCACCAGATATAGCATTTCCCCGAATAAATAATATAAGATTCTGATTATTACCACCATCTTTAACCTTACTATTAATGAGTAGTATAGTAGATAATGGAGCTGGAACAGGATGAACTGTATATCCCCCACTATCATCTAATATTGCACATGGAGGAGCATCAGTAGATTTAGCTATCTTTTCACTTCACCTTGCTGGAATCTCATCAATTCTAGGAGCTGTAAATTTTATTACTACAGTAATTAATATACGATCCTCAGGTATCACTTTTGATCGAATACCCTTATTTGTATGGGCTGTAGTAATTACTGCATTATTATTACTTCTGTCACTACCAGTATTAGCAGGTGCTATTACTATACTATTAACAGATCGAAATTTTAATACTTCATTCTTTGACCCTGCTGGTGGAGGAGATCCAATCCTATACC

>*D. discoidalis*_470809_ GB:MN520762

CAACAAATCATAAAGATATTGGTACACTATATTTTATATTTGGTGCATGAGCAGGAATAGTAGGAACATCCTTAAGAATTTTAATTCGTGCTGAATTAGGCCATCCAGGTTCATTAATTGGAGATGATCAAATCTATAATGTAATTGTTACAGCTCATGCTTTTATTATAATTTTTTTTATAGTAATACCTATTATAATTGGAGGATTTGGTAACTGACTAGTACCCCTAATATTAGGAGCACCAGATATAGCATTTCCCCGAATAAATAATATAAGATTCTGATTATTACCACCATCTTTAACCTTACTATTAATGAGTAGTATAGTAGATAATGGAGCTGGAACAGGATGAACTGTATATCCCCCACTATCATCTAATATTGCACATGGAGGAGCATCAGTAGATTTAGCTATCTTTTCACTTCACCTTGCTGGAATCTCATCAATTCTAGGAGCTGTAAATTTTATTACTACAGTAATTAATATACGATCCTCAGGTATCACTTTTGATCGAATACCCTTATTTGTATGGGCTGTAGTAATTACTGCATTATTATTACTTCTGTCACTACCAGTATTAGCAGGTGCTATTACTATACTATTAACAGATCGAAATTTTAATACTTCATTCTTTGACCCTGCTGGTGGAGGAGATCCAATCCTATACC

>*D. gradus*_50850_ GB:MN520763

--------------------------------------TTTGGAGCATGAGCAGGAATAGTAGGAACATCTTTAAGAATCCTAATTCGAGCTGAATTAGGTCATCCAGGTTCATTAATTGGTGATGATCAAGTTTATAATGTAATCGTAACAGCTCATGCTTTTGTAATAATTTTTTTTATAGTTATACCTATCATAATTGGAGGTTTCGGAAATTGACTTGTTCCTTTAATATTAGGAGCACCAGATATAGCTTTTCCACGAATAAATAATATAAGATTTTGAATACTACCTCCATCTTTAACCCTTTTATTAGTTAGAAGTATAGTAGATAATGGAGCTGGAACAGGTTGAACTGTATACCCTCCCTTATCTTCAAATATTGCTCATGGAGGAGCTTCAGTTGATTTAGCTATTTTTTCCTTACATTTAGCCGGAATTTCATCAATTCTAGGAGCTGTAAATTTTATTACAACTGTAATTAATATACGATCTACAGGAATTTCATTTGATCGAATACCTTTATTTGTATGAGCAGTAGTAATTACAGCATTATTATTACTTTTATCTTTACCAGTATTAGCAGGTGCTATTACTATATTATTAACTGACCGAAATTTTAATACTTCATTCTTTGATCCAGCAGGAGGAGGAGATCCTATTTTATATC

> *D. gradus*_52303_ GB:MN520765

CAACAAATCATAAAGATATTGGTACTTTATATTTTATATTTGGAGCATGAGCAGGAATAGTAGGAACATCTTTAAGAATCCTAATTCGAGCTGAATTAGGTCATCCAGGTTCATTAATTGGTGATGATCAAATTTATAATGTAATCGTAACAGCTCATGCTTTTGTAATAATTTTTTTTATAGTTATACCTATCATAATTGGAGGTTTCGGAAATTGACTTGTTCCTTTAATATTAGGAGCACCAGATATAGCTTTTCCACGAATAAATAATATAAGATTTTGAATACTACCTCCATCTTTAACCCTTTTATTAGTTAGAAGTATAGTAGATAATGGAGCTGGAACAGGTTGAACTGTATACCCTCCCTTATCTTCAAATATTGCTCATGGAGGAGCTTCAGTTGATTTAGCTATTTTTTCCTTACATTTAGCCGGAATTTCATCAATTCTAGGAGCTGTAAATTTTATTACAACTGTAATTAATATACGATCTACAGGAATTTCATTTGATCGAATACCTTTATTTGTATGAGCAGTAGTAATTACAGCATTATTATTACTTTTATCTTTACCAGTATTAGCAGGTGCTATTACTATATTATTAACTGACCGAAATTTTAATACTTCATTCTTTGATCCAGCAGGAGGAGGAGATCCAATTTTATATC

> *D. gradus*_50771_GB:MN520768

CAACAAATCATAAAGATATTGGTACTTTATATTTTATATTTGGAGCATGAGCAGGAATAGTAGGAACATCTTTAAGAATCCTAATTCGAGCTGAATTAGGTCATCCAGGTTCATTAATTGGTGATGATCAAGTTTATAATGTAATCGTAACAGCTCATGCTTTTGTAATAATTTTTTTTATAGTTATACCTATCATAATTGGAGGTTTCGGAAATTGACTTGTTCCTTTAATATTAGGAGCACCAGACAT----------------------------------------------------------------------------------------------------------------------------------------------------------------------------------------GGKATTTCTTCTATTTTAGGAGCTGTAAATTTTATTACAACTGTAATTAATATACGATCTACAGGAATTTCATTTGATCGAATACCTTTATTTGTATGAGCAGTAGTAATTACAGCATTATTATTACTTTTATCTTTACCAGTATTAGCAGGTGCTATTACTATATTATTAACTGACCGAAATTTTAATACTTCATTCTTTGATCCAGCAGGAGGAGGAGATCCTATTTTATATC

>*D. parazardouei*_175301_GB:MN520761

-----------------------------------------------------------------------------------------------------------------------------------------------------------------------------------------------------------------------------------------------------------------------------------------------------------------------------------------------------------------------------------------------------------------------------------------------------ATTTCTTCTATTTTAGGTGCAGTAAATTTTATTACAACTGTAATCAATATACGATCTACAGGAATTACTTTTGATCGTATACCCCTATTTGTTTGAGCAGTAGTAATTACAGCTTTACTATTACTTTTATCCTTACCAGTATTAGCTGGAGCAATTACTATATTATTAACTGATCGTAATTTTAATACATCATTTTTTGATCCAGCAGGAGGTGGAGATCCAATTCTATACC

> *D. parazardouei*_175303_GB:MN520771

-----------------------------------------------------------------------------------------------------------------------------------------------------------------------------------------------------------------------------------------------------------------------------------------------------------------------------------------------------------------------------------------------------------------------------------------------------ATTTCTTCTATTTTAGGTGCAGTAAATTTTATTACAACTGTAATCAATATACGATCTACAGGAATTACTTTTGATCGTATACCCCTATTTGTTTGAGCAGTAGTAATTACAGCTTTACTATTACTTTTATCCTTACCAGTATTAGCTGGAGCAATTACTATATTATTAACTGATCGTAATTTTAATACATCATTTTTTGATCCAGCAGGAGGTGGAGATCCAATTCTATACC

>*D. discoidalis*_470647_GB:MN520764

-----------------------------------------------------------------------------------------------------------------------------------------------------------------------------------------------------------------------------------------------------------------------------------------------------------------------------------------------------------------------------------------------------------------------------------------------------ATTTCTTCTATTTTAGGAGCTGTAAATTTTATTACTACAGTAATTAATATACGATCCTCAGGTATCACTTTTGATCGAATACCCTTATTTGTATGGGCTGTAGTAATTACTGCATTATTATTACTTCTGTCACTACCAGTATTAGCAGGTGCTATTACTATACTATTAACAGATCGAAATTTTAATACTTCATTCTTTGACCCTGCTGGTGGAGGAGATCCAATCCTATACC
